# Supplementary material for: RNA sequencing of transcriptomes in human brain regions: protein-coding and non-coding RNAs, isoforms and alleles
Source: PubMed Central journal article supplement (PMC4657279; doi:10.1186/s12864-015-2207-8), 2015-11-23

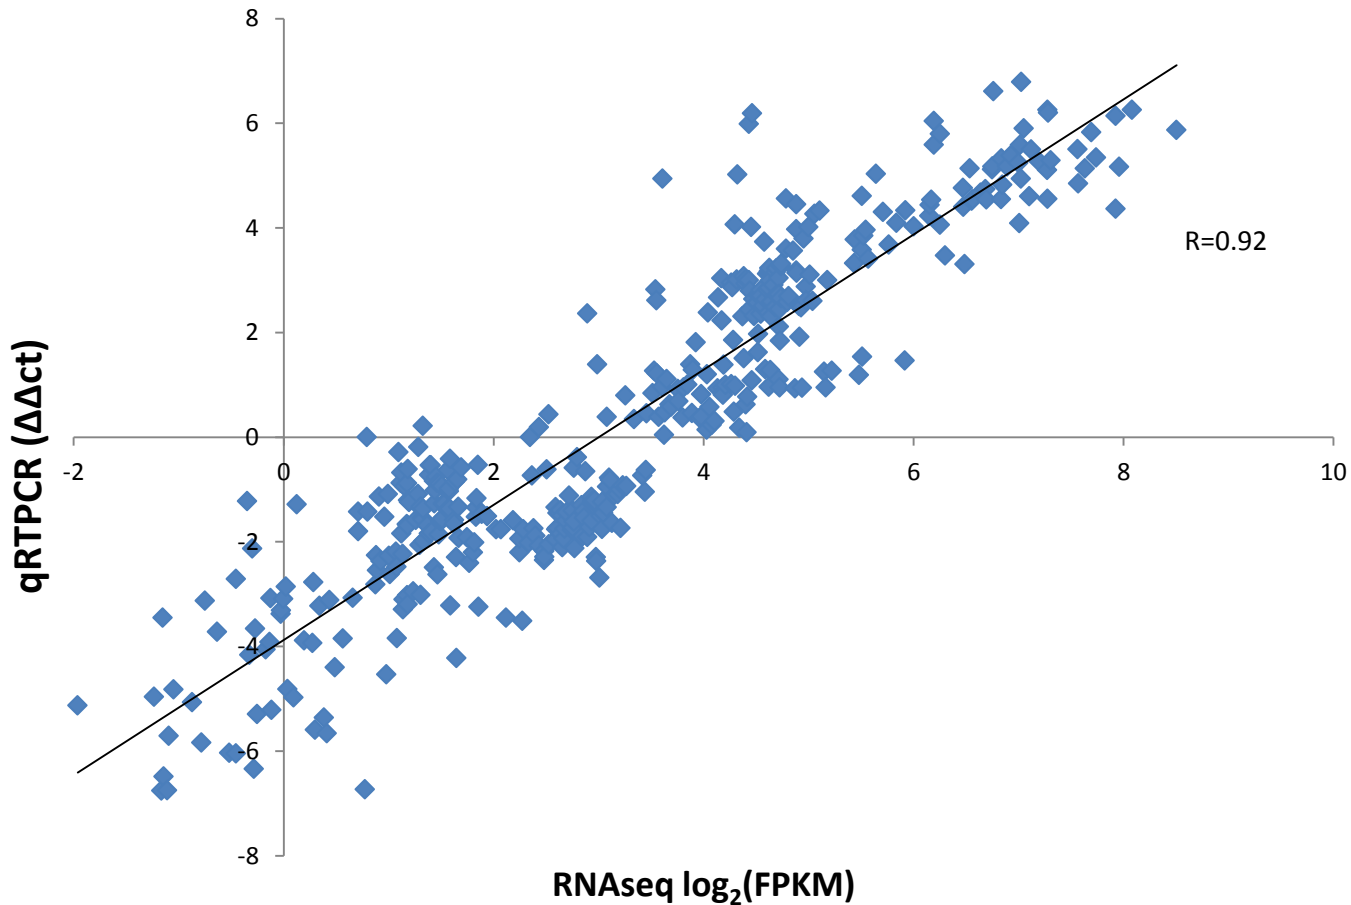

Supplement: 12864_2015_2207_MOESM6_ESM.pdf [file 12864_2015_2207_MOESM6_ESM.pdf]
